# Supplementary material for: Rapid synthesis, structure and photocatalysis of pure bismuth A-site perovskite of Bi(Mg3/8Fe2/8Ti3/8)O3
Source: Royal Society of Chemistry journal article supplement (doi:10.1039/c3dt53621a), 2014-01-01
Supplement: c3dt53621a1.pdf [file c3dt53621a1.pdf]

†Electronic Supplementary Information (ESI) available:

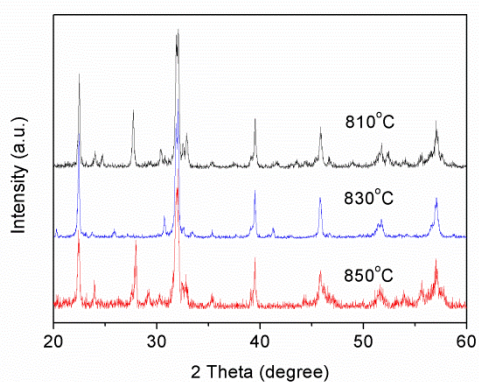

**Fig. S1** The XRD patterns of  $\text{Bi}(\text{Mg}_{3/8}\text{Fe}_{2/8}\text{Ti}_{3/8})\text{O}_3$  obtained at synthesizing temperature of 810 °C, 830 °C, and 850 °C.

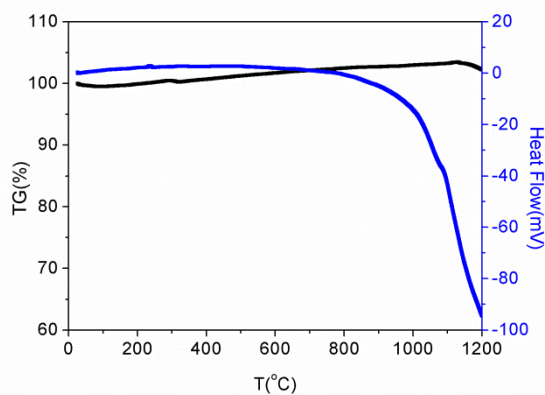

5

**Fig. S2** The DSC-TG patterns of as-synthesized  $\text{Bi}(\text{Mg}_{3/8}\text{Fe}_{2/8}\text{Ti}_{3/8})\text{O}_3$ . The falling branch of the heat flow curve indicates that the  $\text{Bi}(\text{Mg}_{3/8}\text{Fe}_{2/8}\text{Ti}_{3/8})\text{O}_3$  sample begins to decompose at 850 °C

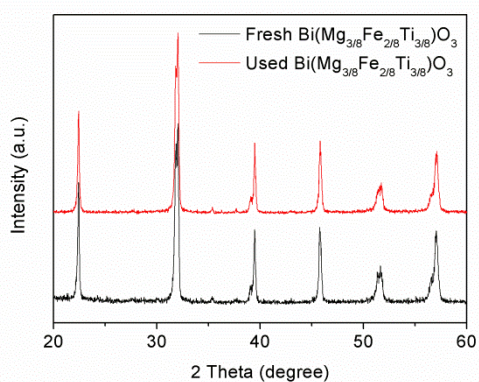

10

**Fig. S3** The XRD patterns of the used and fresh powders of  $\text{Bi}(\text{Mg}_{3/8}\text{Fe}_{2/8}\text{Ti}_{3/8})\text{O}_3$  for the photocatalytic experiment.
